# Supplementary material
Source: PubMed Central journal article supplement (PMC7431022)
Supplement: pnas.2003913117.sapp.pdf [file pnas.2003913117.sapp.pdf]

Supplementary Information for

**Krüppel-like factor 17 upregulates uterine corin expression and promotes spiral artery remodeling in pregnancy**

**This PDF file includes:**

Figures S1 to S9

Table S1



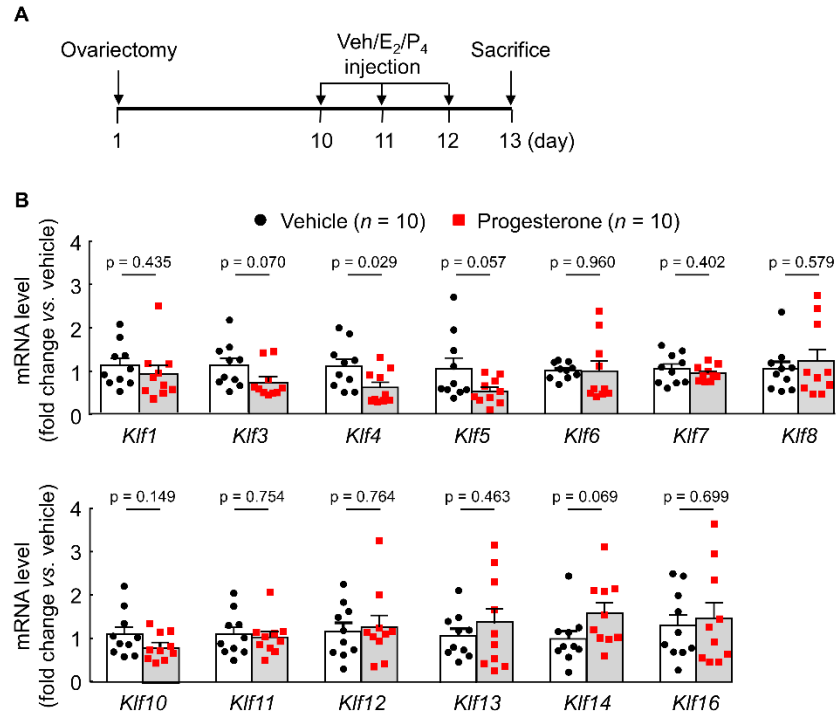

**Fig. S2.** Uterine expression of *Klf* genes in ovariectomized mice treated with progesterone. (A) Schematic illustration of the experiment. Nine days after post-op recovery from ovariectomy, C57BL/6 mice were injected with vehicle (Vec), estrogen (E<sub>2</sub>) or progesterone (P<sub>4</sub>) (s.c., daily for three days). Uteruses were isolated for *Corin* and *Klf* expression analysis. (B) qRT-PCR analysis of mRNA levels for the indicated *Klf* genes. *n* = 10 per group. Data are presented as mean ± SEM; *P* values were analyzed by two-tailed Student's *t* test. ns, not significant.

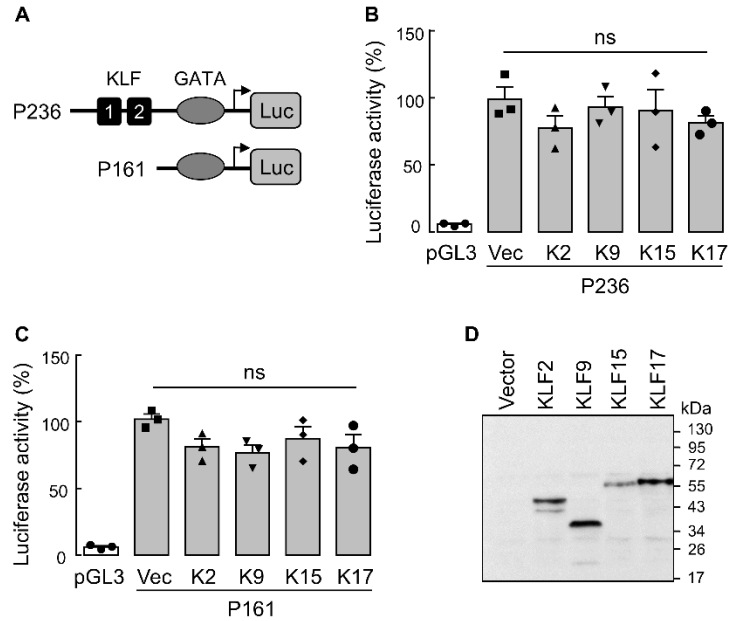

**Fig. S3.** Effects of recombinant KLF protein expression on *CORIN* promoter activities in HL-1 cardiomyocytes. (A) Illustration of *CORIN* promoter constructs used. (B and C) Luciferase activities in HL-1 cells transfected with pGL3 plasmid (negative control) or co-transfected with the P236 (B) or P161 (C) *CORIN* promoter construct and a control pCMV vector (Vec) or plasmids expressing human KLF2 (K2), KLF9 (K9), KLF15 (K15) or KLF17 (K17).  $n = 3$  per group. Data are presented as mean  $\pm$  SEM; ns, not significant, as analyzed by ANOVA. (D) Western blotting of recombinant KLF proteins in transfected HL-1 cells using an anti-FLAG antibody. Data are representative of three experiments.

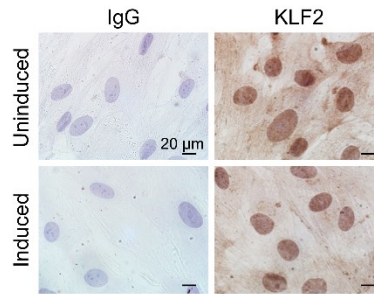

**Fig. S4.** Immunohistochemistry of endogenous KLF2 proteins in control (uninduced) and decidualized (induced) HESCs. The experiment was done using an anti-KLF2 antibody with normal IgG as a negative control. Similar nuclear staining levels of KLF2 were found in uninduced and induced HESCs. Data are representative of three independent experiments.

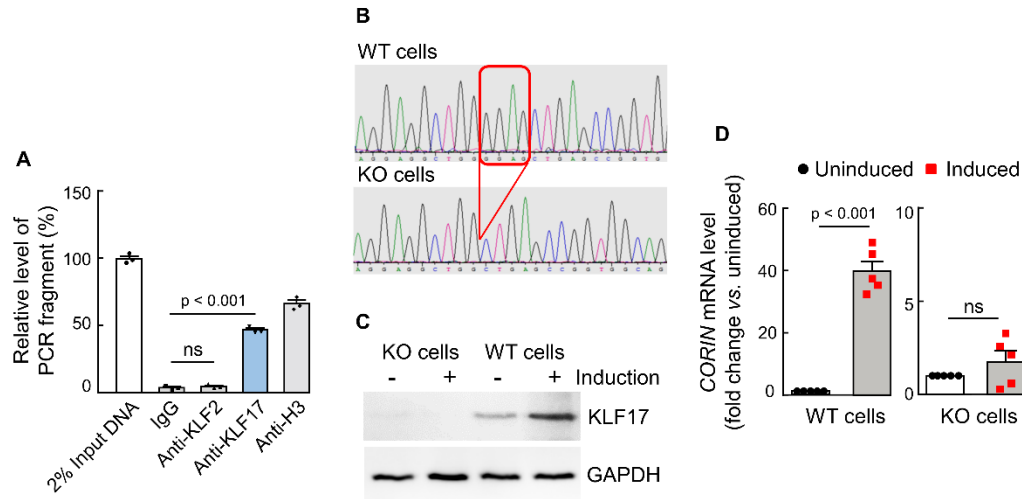

**Fig. S5.** Additional data from ChIP analysis in HESCs and *KLF17*-KO HESCs. (A) ChIP analysis was done in HESCs, as shown in Fig. 5. qPCR was used to quantify levels of PCR products amplified from chromatin fragments that were pulled down with antibodies against KLF2, KLF17 and histone 3 (H3) (positive control) or IgG (negative control). As another positive control, 2% input DNA fragments were used as templates in the experiment.  $n = 3$  per group. Data are presented as mean  $\pm$  SEM; ns, not significant;  $P < 0.001$ , as analyzed by ANOVA. (B) The *KLF17* gene was disrupted in a second line of HESCs using CRISPR/Cas9. Partial sequencing data from WT and *KLF17*-KO HESCs are shown. Red box indicates the deleted sequence. (C) Western blotting of endogenous KLF17 protein in WT and *KLF17*-KO HESCs without (-) or with (+) decidualization (induction). GAPDH was a control. Data are representative of three independent experiments. (D) *CORIN* mRNA levels in WT and *KLF17*-KO HESCs without (uninduced) or with (induced) decidualization.  $n = 5$  per group. Data are presented as mean  $\pm$  SEM; ns, not significant;  $P < 0.001$ , as analyzed by two-tailed Student's  $t$  test.

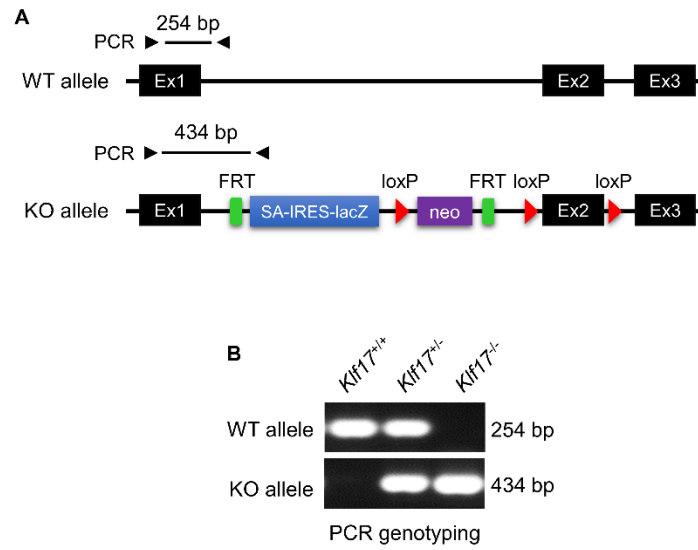

**Fig. S6.** Generation of *Klf17*<sup>-/-</sup> mice. (A) Illustration of WT and knockout (KO) *Klf17* alleles. Locations of PCR primers used for genotyping the WT and KO alleles are indicated. (B) PCR products from *Klf17*<sup>+/+</sup>, *Klf17*<sup>+/-</sup> and *Klf17*<sup>-/-</sup> mice with WT (254-bp fragment) and KO (434-bp fragment) alleles.

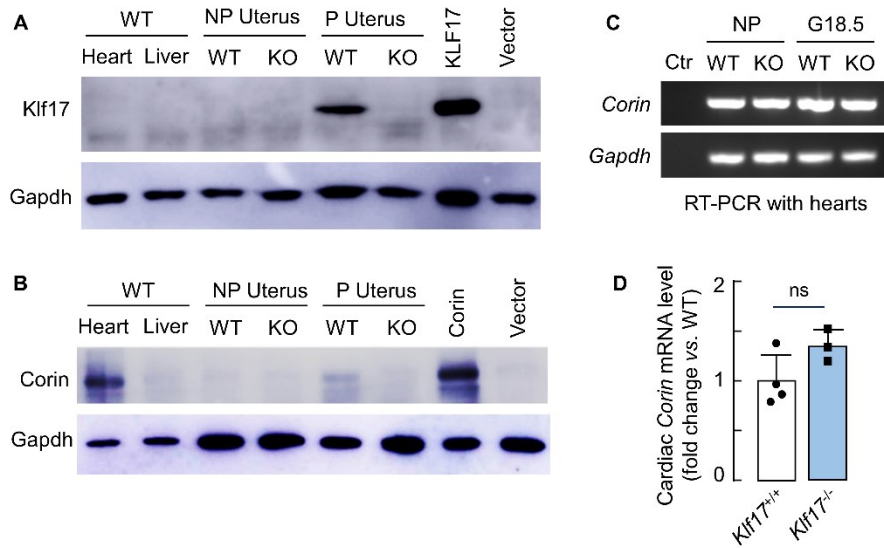

**Fig. S7.** Analysis of Klf17 and corin expression in  $Klf17^{+/+}$  (WT) and  $Klf17^{-/-}$  (KO) mice. (A and B) Uterine Klf17 (A) and corin (B) expression in non-pregnant (NP) and pregnant (P) (G12.5) WT and KO mice was analyzed by western blotting. Samples from hearts and livers were used as controls. Recombinant KLF17 and corin expressed in transfected HEK293 cells were used as additional controls. GAPDH was a protein loading control. Data are representative of three experiments. (C) Cardiac *Corin* expression was analyzed by RT-PCR with hearts from NP and P (G18.5) WT and KO mice. *Gapdh* was a positive control. Samples, in which cDNA templates were omitted, were used as a negative control (Ctr). (D) qRT-PCR was done to verify *Corin* mRNA levels in hearts from NP  $Klf17^{+/+}$  and  $Klf17^{-/-}$  mice.  $n = 3-4$  per group. Data are presented as mean  $\pm$  SEM; ns, not significant, as analyzed by two-tailed Student's *t* test.



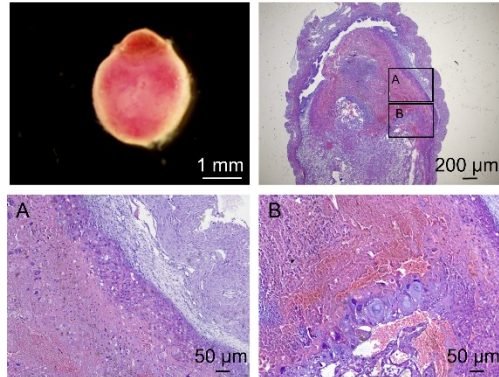

**Fig. S8.** Histological analysis of an abnormal embryo from *Klf17*<sup>-/-</sup> mice. *Klf17*<sup>-/-</sup> female and male mice were mated. At G12.5 day, embryos were isolated. Top left panel shows an abnormal embryo. Histological analysis was done in H&E-stained tissue sections, revealing tissue necrosis, as shown in an image with low magnification (x 25) (top right panel) and higher magnification (x 100) (bottom two panels).

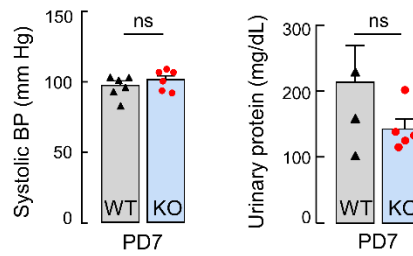

**Fig. S9.** Blood pressure and urinary protein levels in postpartum *Klf17*<sup>+/+</sup> (WT) and *Klf17*<sup>-/-</sup> (KO) mice. Systolic blood pressure (BP) (left) and urinary protein levels (right) were measured in WT and KO mice on postpartum day (PD) 7. n = 3-6 per group. Data are presented as mean ± SEM; *P* values were analyzed by two-tailed Student's *t* test; ns, not significant.

**Table S1. Primers used in RT-PCR and qRT-PCR**

| Gene         | Locus          | Primer  | Sequence                  | Size (bp) |
|--------------|----------------|---------|---------------------------|-----------|
| <i>Corin</i> | NM_016869.3    | forward | GGTCCGCATTATCCCTCTGG      | 231       |
|              |                | reverse | ACACTCCAGGTCCCAGAACT      |           |
| <i>Corin</i> | NM_016869.3    | forward | CAAGTCTGAGGTCAACTGC       | 64        |
|              |                | reverse | TGTCCACTTCTGCATTCCAC      |           |
| <i>Klf1</i>  | NM_010635.3    | forward | CAAGAGCTCGCACCTCAAG       | 92        |
|              |                | reverse | GAGCGAACCTCCAGTCACA       |           |
| <i>Klf2</i>  | NM_008452.2    | forward | GGATCTTTGGAGGAATCACG      | 61        |
|              |                | reverse | TGTCCCCTCAGGACCTACC       |           |
| <i>Klf3</i>  | NM_008453.5    | forward | TCGCACTTGAAAGCACACA       | 52        |
|              |                | reverse | TCCCAGGTGCATTTGTACG       |           |
| <i>Klf4</i>  | NM_010637.3    | forward | GCTCCTCTACAGCCGAGAATC     | 60        |
|              |                | reverse | ATGTCCGCCAGGTTGAAG        |           |
| <i>Klf5</i>  | NM_009769.4    | forward | CCGGAGACGATCTGAAACAC      | 116       |
|              |                | reverse | CAGATACTTCTCCATTTACATCTTG |           |
| <i>Klf6</i>  | NM_011803.2    | forward | ACGAAAAGCTCCCCTTGAA       | 78        |
|              |                | reverse | ACAACCTTCCCATGAGCATC      |           |
| <i>Klf7</i>  | NM_033563.2    | forward | CCGGCTACTTCTCAGCTTTG      | 72        |
|              |                | reverse | GGTAGCGTTCCAACCTCAAGG     |           |
| <i>Klf8</i>  | NM_173780.5    | forward | GGGCTGCAAGGAAAGGAT        | 97        |
|              |                | reverse | GTATCTGACTTTCCAAGCCACTG   |           |
| <i>Klf9</i>  | NM_010638.5    | forward | CTCAGAACTGCTTTTAACATTAGGG | 61        |
|              |                | reverse | AACACTTTCCTTTTTAGCTCGTG   |           |
| <i>Klf10</i> | NM_013692.3    | forward | AGCCAACCATGCTCAACTTC      | 76        |
|              |                | reverse | GGCTTTTCAGAAATTAGTTCCATT  |           |
| <i>Klf11</i> | NM_178357.3    | forward | CTTGCCACAGAACACCTTCC      | 65        |
|              |                | reverse | TATTTCCAATGGCCATGACAC     |           |
| <i>Klf12</i> | NM_010636.3    | forward | CCTTAGATAGCGTTAATGAAACTGG | 76        |
|              |                | reverse | GGGGATGGATGTACCTCTTGTA    |           |
| <i>Klf13</i> | NM_021366.3    | forward | CTGGGCACATTGTACTGGAC      | 60        |
|              |                | reverse | GGAAGCCGGATAAAACAACA      |           |
| <i>Klf14</i> | NM_001135093.1 | forward | TGATCGAGTACCGAGGTCGT      | 86        |
|              |                | reverse | GCTGGAGTCGGAACCAGAG       |           |
| <i>Klf15</i> | NM_001355668.1 | forward | TGTGGGCCAGAAGTTTCC        | 62        |
|              |                | reverse | AAGTGCATTTGTGCATTTTGAG    |           |
| <i>Klf16</i> | NM_078477.2    | forward | CACCTGCGGACTCACACA        | 76        |
|              |                | reverse | CAGAACGGGCGAACTTCTT       |           |
| <i>Klf17</i> | NM_029416.2    | forward | GCAGCCATTCTGACACGTTA      | 77        |
|              |                | reverse | GACTTCTGCTATCCCTAACCTCAG  |           |
| <i>Klf17</i> | NM_029416.2    | forward | GCGTAGTAGTGTTGGGACC       | 199       |
|              |                | reverse | TGGCTGATGAAATCCGCTGT      |           |

| Gene         | Locus          | Primer  | Sequence                | Size (bp) |
|--------------|----------------|---------|-------------------------|-----------|
| <i>Gapdh</i> | NM_001289726.1 | forward | TGTCCTACCCCAATGTGT      | 138       |
|              |                | reverse | GGTCCTCAGTGTAGCCAAG     |           |
| <i>CORIN</i> | NM_006587.4    | forward | GCAAGCAGATGGGTTTAGGA    | 92        |
|              |                | reverse | CCAGTTGGAGTGTAAATGTCAGC |           |
| <i>PRL</i>   | NM_000948.6    | forward | CAAAGGATCGCCATGGAA      | 60        |
|              |                | reverse | CACAGGAGCAGGTTTGACAC    |           |
| <i>GAPDH</i> | NM_001256799.3 | forward | GGTCTCCTCTGACTTCAACA    | 116       |
|              |                | reverse | AGCCAAATTCGTTGTCATAC    |           |
